# Supplementary material
Source: Elsevier journal article supplement (https://www.sciencedirect.com/science/article/pii/S0014256523000589)
Supplement: mmc1 [file S0014256523000589:mmc1.doc]

**Apéndice – Figuras**

**Figura 1 del apéndice. Evolución de los valores clínicos y analíticos al ingreso hospitalario en función de los días transcurridos desde el comienzo de los síntomas hasta el ingreso hospitalario.**


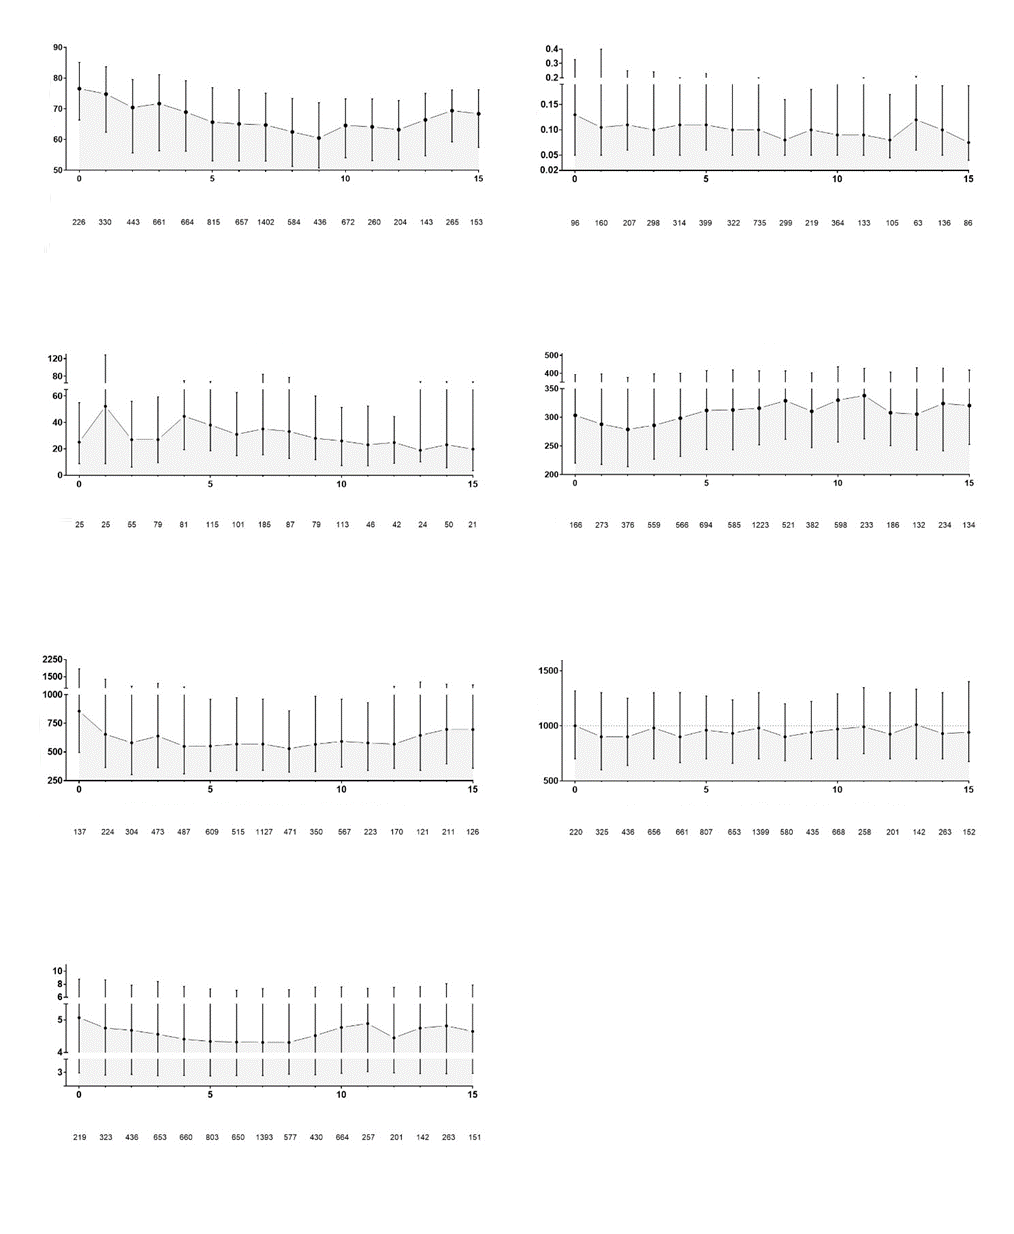


**Edad**

**Días transcurridos desde el comienzo de los síntomas hasta el ingreso hospitalario**

**Edad (años)**

**N.º de pacientes**

**Procalcitonina**

**Días transcurridos desde el comienzo de los síntomas hasta el ingreso hospitalario**

**ng/ml**

**N.º de pacientes**

**IL-6**

**Días transcurridos desde el comienzo de los síntomas hasta el ingreso hospitalario**

**pg/ml**

**N.º de pacientes**

**LDH**

**Días transcurridos desde el comienzo de los síntomas hasta el ingreso hospitalario**

**U/l**

**N.º de pacientes**

**Dímero D**

**Días transcurridos desde el comienzo de los síntomas hasta el ingreso hospitalario**

**ng/ml**

**N.º de pacientes**

**Recuento de linfocitos**

**Días transcurridos desde el comienzo de los síntomas hasta el ingreso hospitalario**

**células/mm3**

**N.º de pacientes**

**Cociente neutrófilos/linfocitos**

**Días transcurridos desde el comienzo de los síntomas hasta el ingreso hospitalario**

**Cociente neutrófilos/linfocitos**

**N.º de pacientes**

**Figura 2 del apéndice. Diagrama de bosque aleatorio.**


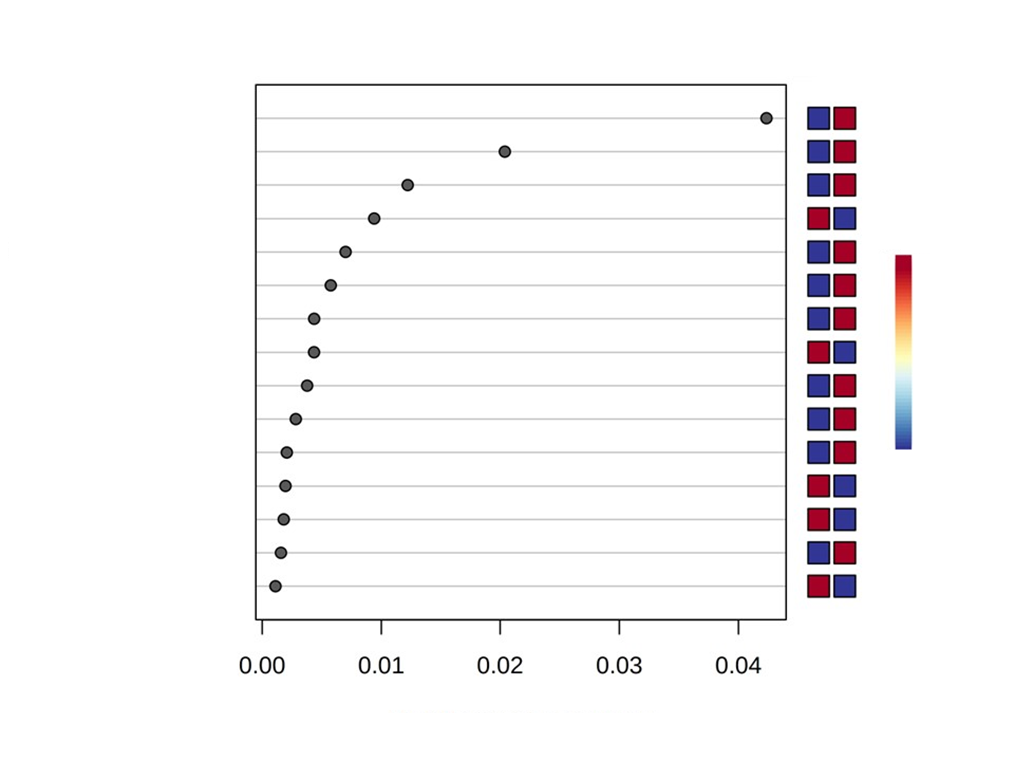


**Edad (años)**

**Cociente SpO2/FiO2**

**LDH**

**FGe (CKD-EPI)**

**Índice de comorbilidad de Charlson**

**Dímero D (ng/ml)**

**Neutrófilos, x 109/l**

**Plaquetas, x 109/l**

**PCR (mg/dl)**

**Leucocitos, x 109 /l**

**AST (U/l)**

**Hemoglobina (g/dl)**

**Cociente neut./linf.**

**Enfermedad CV de órganos diana**

**Sodio (mmol/l)**

Disminución media de la precisión

Bajo

Alto

**Sí**

**No**

AST = aspartato-transaminasa; PCR = proteína C-reactiva; CV = cardiovascular; FGe (CKD-EPI) = filtración glomerular estimada medida mediante la ecuación de la Chronic Kidney Disease Epidemiology Collaboration; LDH = lactato deshidrogenasa; cociente neut./linf. = cociente entre neutrófilos y linfocitos; SpO2/FiO2 = cociente entre saturación de oxígeno y fracción de oxígeno inspirado.

**Apéndice – Tablas**

| Tabla 1 del apéndice. Fármacos relevantes recibidos durante la hospitalización | | | |  |
| --- | --- | --- | --- | --- |
|  | **Total**  (n = 7915) | **Presentación precoz**  (n = 2324) | **Presentación tardía**  (n = 5591) | ***p*** |
| LPVr, n.º/n.º total (%) | 5371/7855 (68,4) | 1432/867 (62,3) | 3939/5556 (70,9) | <0,001 |
| Remdesivir, n.º/n.º total (%) | 42/7781 (0,5) | 8/2280 (0,4) | 34/5501 (0,6) | 0,143 |
| Inmunoterapias (tocilizumab, anakinra o ambos), n.º/n.º total (%) | 801/7734 (10,4) | 197/2256 (8,7) | 604/5478 (11,0) | 0,003 |
| Tocilizumab | 782/7832 (10,0) | 191/2293 (8,9) | 591/5539 (10,7) | 0,002 |
| Anakinra | 41/7735 (0,5) | 10/2256 (0,4) | 31/5479 (0,6) | 0,500 |
| Corticoesteroides, n.º/n.º total (%) | 2684/7825 (34,3) | 770/2290 (33,6) | 1914/5535 (34,6) | 0,418 |
| Hidroxicloroquina, n.º/n.º total (%) | 7019/7869 (89,2) | 1957/2307 (84,8) | 5062/5562 (91,0) | <0,001 |
| Anticoagulantes (anticoagulantes orales o HBPM), n.º/n.º total (%) | 6606/7756 (85,2) | 5024/5926 (84,8) | 1582/1830 (86,4) | 0,079 |
| Anticoagulantes orales1 | 222/7810 (2,8) | 88/2287 (3,8) |  | 0,001 |
| HBPM2 | 6621/7810 (84,8) | 1884/2282 (82,6) | 4737/5528 (85,7) | 0,001 |
| LPVr = lopinavir/ritonavir; HBPM = heparina de bajo peso molecular.  1 Antagonistas de la vitamina K o anticoagulantes orales directos.  2 En una dosis profiláctica o anticoagulante. | | | | |

| Tabla 2 del apéndice. Resultados durante y después de la hospitalización | | | |  |
| --- | --- | --- | --- | --- |
|  | **Total**  (n = 7915) | **Presentación precoz**  (n = 2324) | **Presentación tardía**  (n = 5591) | ***p*** |
| Mortalidad intrahospitalaria, n.º/n.º total (%) | 1237/7915 (15,6) | 508/2324 (21,9) | 729/5591 (13,0) | <0,001 |
| Síndrome de dificultad respiratoria aguda moderado o grave (SpO2/FiO2 <235 o PaO2/FiO2 <200), n.º/n.º total (%) | 1817/7858 (23,1) | 611/2304 (26,5) | 1206/5554 (21,7) | <0,001 |
| Ingreso en unidad de cuidados intensivos, n.º/n.º total (%) | 732/7902 (9,3) | 205/2318 (8,8) | 527/5584 (9,4) | 0,407 |
| Duración de la estancia hospitalaria (días), mediana (AIC) | 9 (6-14)  7915 | 9 (6-15)  2324 | 9 (6-13)  5591 | <0,001 |
|  | | | | |

| Tabla 3 del apéndice. Análisis de regresión de Cox unifactorial de la mortalidad intrahospitalaria | | | | |
| --- | --- | --- | --- | --- |
|  | RRI | Límite inferior  (IC del 95 %) | Límite superior  (IC del 95 %) | *p* |
| Características iniciales de los pacientes hospitalizados por COVID-19 | | | | |
| Días transcurridos desde el comienzo de los síntomas hasta el ingreso hospitalario | 0,935 | 0,920 | 0,950 | <0,001 |
| Edad (cada año) | 1,077 | 1,071 | 1,082 | <0,001 |
| Sexo (varones) | 1,319 | 1,171 | 1,485 | <0,001 |
| IMC | 1,028 | 1,013 | 1,043 | <0,001 |
| Fumadores activos | 1,013 | 0,789 | 1,302 | 0,917 |
| Raza |  |  |  |  |
| Blanca | 2,756 | 2,122 | 3,580 | <0,001 |
| Hispanomericanos | 0,382 | .287 | .508 | <0,001 |
| Africanos | 0,270 | 0,067 | 1,080 | 0,018 |
| Asiáticos | 0,440 | 0,142 | 1,365 | 0,100 |
| Índice de comorbilidad de Charlson (puntuación CCI) | 1,198 | 1,171 | 1,226 | <0,001 |
| Puntuación CCI ≥1 | 2,396 | 2,116 | 2,714 | <0,001 |
| Estado funcional moderadamente dependiente | 3,240 | 2,781 | 3,774 | <0,001 |
| Hipertensión arterial | 2,397 | 2,122 | 2,707 | <0,001 |
| Cualquier enfermedad vascular (arteriopatía coronaria, ictus o AIT, o AP) | 2,030 | 1,784 | 2,310 | <0,001 |
| Arteriopatía coronaria2 | 2,048 | 1,743 | 2,406 | <0,001 |
| Ictus o accidente isquémico transitorio previo | 1,791 | 1,465 | 2,190 | <0,001 |
| Arteriopatía periférica | 2,107 | 1,714 | 2,590 | <0,001 |
| Insuficiencia cardíaca congestiva | 2,519 | 2,123 | 2,989 | <0,001 |
| Fibrilación auricular | 2,299 | 1,983 | 2,664 | <0,001 |
| Diabetes mellitus | 1,715 | 1,514 | 1,943 | <0,001 |
| Diabetes con complicaciones relacionadas con la diabetes | 2,153 | 1,774 | 2,613 | <0,001 |
| Diabetes insulinodependiente | 1,886 | 1,549 | 2,297 | <0,001 |
| EPOC | 2,161 | 1,846 | 2,530 | <0,001 |
| Asma | 0,770 | 0,615 | 0,963 | 0,018 |
| Apnea obstructiva del sueño | 1,184 | .968 | 1,449 | 0,109 |
| Enfermedad renal crónica | 2,494 | 2,096 | 2,966 | <0,001 |
| Enfermedad renal crónica avanzada | 2,526 | 2,123 | 3,006 | <0,001 |
| Pacientes en diálisis | 1,739 | 1,118 | 2,706 | 0,024 |
| Hepatopatía crónica (cualquier estadio) | 1,436 | 1,118 | 1,843 | 0,005 |
| Hepatopatía crónica avanzada | 1,411 | .874 | 2,278 | 0,182 |
| Neoplasias malignas | 1,816 | 1,562 | 2,112 | <0,001 |
| Tumor sólido | 1,685 | 1,425 | 1,992 | <0,001 |
| Tumor sólido metastásico | 1,577 | 1,148 | 2,166 | 0,005 |
| Cáncer hemático | 2,060 | 1,556 | 2,726 | <0,001 |
| Infección por el VIH | 0,686 | 0,326 | 1,443 | 0,290 |
| Enfermedades reumáticas sistémicas | 1,544 | 1,146 | 2,080 | 0,004 |
| Trasplante de órgano sólido | 1,569 | 1,064 | 2,315 | 0,034 |
| Uso crónico de glucocorticoides | 2,146 | 1,761 | 2,615 | <0,001 |
| Uso crónico de anticoagulantes | 2,529 | 2,199 | 2,908 | <0,001 |
| Uso crónico de antiagregantes plaquetarios | 1,947 | 1,708 | 2,219 | <0,001 |
| Uso crónico de estatinas | 1,668 | 1,490 | 1,868 | <0,001 |
| Uso crónico de IECA | 1,664 | 1,460 | 1,896 | <0,001 |
| Uso crónico de ARA | 1,478 | 1,304 | 1,674 | <0,001 |
| Síntomas, constantes vitales y análisis clínicos en el momento del ingreso | | | | |
| Disnea | 1,672 | 1,478 | 1,892 | <0,001 |
| Tos | 0,763 | .672 | .867 | <0,001 |
| Anosmia o disgeusia | 0,318 | .220 | .461 | <0,001 |
| Artralgias o mialgias | 0,549 | .479 | .629 | <0,001 |
| Cefalea | .441 | .348 | .558 | <0,001 |
| Dolor abdominal | 1,024 | .817 | 1,283 | 0,838 |
| Diarrea | .702 | .608 | .810 | <0,001 |
| Crepitantes | 1,511 | 1,341 | 1,703 | <0,001 |
| Sibilancias | 1,626 | 1,342 | 1,971 | <0,001 |
| Constantes vitales (n.º/n.º total (%) o mediana (AIC)) | | | | |
| Temperatura al ingreso | 1,059 | 0,999 | 1,122 | 0,550 |
| Presión arterial sistólica | 1,000 | 0,998 | 1,003 | 0,784 |
| Frecuencia cardíaca | 0,999 | 0,996 | 1,003 | 0,704 |
| Alteración del estado mental | 3,397 | 2,940 | 3,925 | <0,001 |
| Frecuencia respiratoria ≥20 respiraciones/min | 2,571 | 2,293 | 2,883 | <0,001 |
| SpO2/FiO2 | 0,995 | 0,995 | 0,996 | <0,001 |
| Puntuación qSOFA ≥2 | 3,385 | 2,903 | 3,947 | <0,001 |
| Estudios de ingreso (n.º/n.º total (%) o mediana (AIC)) | | | | |
| Recuento de linfocitos, x 109/l | 0,990 | 0,961 | 1,019 | 0,489 |
| Recuento de neutrófilos, x 109/l | 1,034 | 1,028 | 1,039 | <0,001 |
| Cociente neutrófilos/linfocitos | 1,008 | 1,007 | 1,010 | <0,001 |
| Recuento de plaquetas, x 109/l | 0,998 | 0,998 | 0,999 | <0,001 |
| Hemoglobina, g/dl | 0,887 | 0,861 | 0,913 | <0,001 |
| Sodio (mmol/l) | 0,985 | 0,971 | 0,999 | 0,033 |
| Creatinina (mg/dl) | 1,330 | 1,285 | 1,375 | <0,001 |
| FGe (CKD-EPI) | 0,972 | 0,970 | 0,974 | <0,001 |
| LDH (U/L) | 1,001 | 1,001 | 1,001 | <0,001 |
| AST (U/l) | 1,001 | 1,001 | 1,002 | <0,001 |
| ALT (U/l) | 0,999 | 0,998 | 1,001 | 0,197 |
| Cociente AST/ALT | 1,257 | 1,219 | 1,296 | <0,001 |
| Creatina-cinasa (U/l) | 1,000 | 1,000 | 1,000 | 0,211 |
| Lactato venoso >2 mmol/l | 1,480 | 1,259 | 1,741 | <0,001 |
| Procalcitonina (ng/ml) | 1,217 | 1,171 | 1,264 | <0,001 |
| Ferritina (ng/ml) | 1,000 | 1,000 | 1,000 | <0,001 |
| PCR (mg/dl) | 1,038 | 1,033 | 1,043 | <0,001 |
| Interleucina 6 (pg/ml) | 1,001 | 1,000 | 1,001 | 0,027 |
| Dímero D (ng/ml) | 1,000 | 1,000 | 1,000 | <0,001 |
| Fibrinógeno (mg/dl) | 1,000 | 1,000 | 1,000 | 0,592 |
| Tiempo de tromboplastina parcial activado (s) | 1,012 | 1,008 | 1,017 | <0,001 |
| Infiltrados pulmonares en la radiografía de tórax | 1,395 | 1,133 | 1,718 | 0,002 |
| IECA = inhibidores de la enzima convertidora de la angiotensina; ARA = antagonista de los receptores de la angiotensina II; IMC = índice de masa corporal, calculado como el cociente peso (kg)/estatura2 (m); EPOC = enfermedad pulmonar obstructiva crónica; VIH = virus de la inmunodeficiencia humana. | | | | |
